# Supplementary material
Source: publisher figshare collection journal article supplement (https://karger.figshare.com/ndownloader/files/28746675)
Supplement: Supplementary file 1 [file 28746675]

**Members of Researcher Team on Basic and Applied Clinical Neurosciences SEMINEC**

- Carlos Alberto Hurtado González
- Carlos Steven Marmolejo Escobar
- Sebastián Ospina Otalvaro
- Juan David Sánchez Tobón
- Karen Julieth Quebrada mera
- Valentina Triana Díaz
- Valentina Herrera Montoya
- Jonatan Julián Pabón Álvarez
- Luis Miguel Saldarriaga Viveros
- Karol Andrea chamorro Berrio
